# Supplementary material
Source: PubMed Central journal article supplement (PMC4366751)
Supplement: supp_114.062877_supplemental_62877.pdf [file supp_114.062877_supplemental_62877.pdf]

## **Drug Metabolism and Disposition**

### **Quantitative profiling of human renal UGTs and glucuronidation activity: a comparison of normal and tumoral kidney tissues.**

Guillaume Margaillan, Michèle Rouleau, John K. Fallon, Patrick Caron, Lyne Villeneuve, Véronique Turcotte, Philip C. Smith, Melanie S. Joy and Chantal Guillemette

Corresponding Author: Chantal Guillemette:

Pharmacogenomics Laboratory, CHU de Québec, R4720, 2705 blvd Laurier, Québec, Canada, G1V 4G2 Tel: 418-654-2296

e-mail: [chantal.guillemette@crchudequebec.ulaval.ca](mailto:chantal.guillemette@crchudequebec.ulaval.ca)

Supplemental Tables : 2

**Supplemental Table 1:** Signature peptides and transitions for absolute quantification of UGT proteins.

| UGT     | Signature peptide                                     | MRM 1                | MRM 2              |
|---------|-------------------------------------------------------|----------------------|--------------------|
| UGT1A1  | D <sub>70</sub> GAFYTLK <sub>77</sub>                 | 462.75/681.39 (y5)   | 462.75/524.31 (y4) |
| UGT1A3  | Y <sub>164</sub> LSIPTVFFLR <sub>174</sub>            | 681.40/1085.63 (y9)  | 681.40/885.52 (y7) |
| UGT1A4  | Y <sub>164</sub> LSIPAVFFWR <sub>174</sub>            | 704.89/1132.61 (y9)  | 704.89/932.51 (y7) |
| UGT1A5  | Y <sub>164</sub> LSIPAVFFLR <sub>174</sub>            | 666.39/1055.64 (y9)  | 666.39/855.53 (y7) |
| UGT1A6  | D <sub>44</sub> IVEVLSDR <sub>52</sub>                | 526.29/724.40 (y6)   | 526.29/595.35 (y5) |
| UGT1A7  | W <sub>98</sub> TAPLR <sub>103</sub>                  | 377.22/567.35 (y5)   | 377.22/466.32 (y4) |
| UGT1A8  | G <sub>52</sub> HEVVVVMPEVSWQLGK <sub>68</sub>        | 634.68/526.29 (y9)   | 634.68/720.40 (b7) |
| UGT1A9  | G <sub>171</sub> ILCHYLEEGAQCPAPLSYVPR <sub>192</sub> | 847.41/1009.56 (y9)  | 847.41/841.48 (y7) |
| UGT1A10 | Y <sub>160</sub> FSLPSVVFTR <sub>170</sub>            | 663.36/1015.59 (y9)  | 663.36/815.47 (y7) |
| UGT2B4  | F <sub>174</sub> SPGYAIEK <sub>182</sub>              | 510.27/785.42 (y7)   | 510.27/688.41 (y6) |
| UGT2B7  | A <sub>253</sub> DVWLIR <sub>259</sub>                | 441.76/696.43 (y5)   | 441.76/597.39 (y4) |
| UGT2B10 | G <sub>49</sub> HEVTVLASSASILFDPNDSSTLK <sub>72</sub> | 832.77/1131.54 (y10) | 832.77/869.48 (y8) |
| UGT2B15 | F <sub>175</sub> SVGYTFEK <sub>183</sub>              | 543.28/851.44 (y7)   | 543.28/752.38 (y6) |
| UGT2B17 | F <sub>175</sub> SVGYTVEK <sub>183</sub>              | 519.28/803.43 (y7)   | 519.28/704.40 (y6) |

**Supplemental Table 2: List of specific primers for qPCR**

| <b>Gene</b>                          | <b>Primer</b> | <b>Sequence (5'-3')</b>     | <b>Concentration /<br/>Annealing<br/>Temperature</b> |
|--------------------------------------|---------------|-----------------------------|------------------------------------------------------|
| <i>UGT1A1</i>                        | 1A1f          | GAGAGAGGTGACTGTCCAGGAC      | 200 nM/60°C                                          |
|                                      | 1A1r          | CAAATTCCTGGGATAGTGGATTTT    |                                                      |
| <i>UGT1A3</i>                        | 1A3f          | TGAATTTGATCGCCATGTGC        | 200 nM/60°C                                          |
|                                      | 1A3r          | GTAGCTCCACACAAGACCTATGAT    |                                                      |
| <i>UGT1A6</i>                        | 1A6f          | GTACTTCATCAACTGCCAGAGCC     | 600 nM/58°C                                          |
|                                      | 1A6r          | CAGGGAACACGGAAAACCCCTGA     | 400nM/58°C                                           |
| <i>UGT1A7</i>                        | 1A7f          | AGTCATGCCAGAGGTGAGTTGGCA    | 600 nM/60°C                                          |
|                                      | 1A7r          | TGCACTTCGCAATGGTGCCGT       |                                                      |
| <i>UGT1A8</i>                        | 1A8f          | CCCATTCCCCTATGTGTTTC        | 600 nM/60°C                                          |
|                                      | 1A8r          | GCCCCCTGAGGATAAGTTTC        |                                                      |
| <i>UGTG1A9</i>                       | 1A9f          | GGAGCCACTGGTTCACCATGAG      | 300 nM/60°C                                          |
|                                      | 1A9r          | AGATCCTCCAGGGTATATGAAGTTGAA |                                                      |
| <i>UGT1A10</i>                       | 1A10f         | TCGTACACTCTGGAAGATCAGAA     | 300 nM/60°C                                          |
|                                      | 1A10r         | ACTTTGTGCCTGTGCTTTCC        | 600 nM/60°C                                          |
| <i>UGT2B7</i><br>( <i>exon 1-2</i> ) | 1568f         | GTGCTTTACTTTGACTTTTGGTTTCG  | 300 nM/60°C                                          |
|                                      | 2696r         | GGAGTTTCGAATAAGCCATAC       |                                                      |
| <i>UGT2B7</i><br>( <i>exon 2-3</i> ) | 2695f         | AGACAATGGGGAAAGCTGACG       | 150 nM/60°C                                          |
|                                      | 2697r         | TCTCCAGAGCTCTGTACAAAG       | 450 nM/60°C                                          |
| <i>36B4</i>                          | 75f           | CCCATGTGAAGTCACTGTGC        | 125 nM/60°C                                          |
|                                      | 76r           | CAATGGCAGCATCTACAACC        |                                                      |
